# Supplementary material
Source: PubMed Central journal article supplement (PMC8324401)
Supplement: mmc1.pdf [file mmc1.pdf]

## Encuesta de evaluación de CONTENIDO de la escala PCFS

|         |       |       |            |                           |                    |                        |
|---------|-------|-------|------------|---------------------------|--------------------|------------------------|
| Nombre: | Sexo: | Edad: | Profesión: | Grado Acad.: Lic. Mg. PhD | Años de Profesión: | Lugar de trabajo _____ |
|---------|-------|-------|------------|---------------------------|--------------------|------------------------|

| 1                 | 2             | 3                              | 4          | 5              |
|-------------------|---------------|--------------------------------|------------|----------------|
| Muy en desacuerdo | En desacuerdo | Ni de acuerdo ni en desacuerdo | De acuerdo | Muy de acuerdo |

**INSTRUCCIONES:** A continuación, presentamos a Usted los siguientes enunciados que tiene por objetivo evaluar desde su perspectiva el CONTENIDO de la escala PCFS. Se presentan 5 opciones de respuesta. Por favor, elija una, y marque con una “X” la alternativa que usted considere más adecuada.

|                     | DIMENSIÓN   | AFIRMACIONES                                                                                                                                                                                                                        | ALTERNATIVAS DE RESPUESTAS |   |   |   |   |
|---------------------|-------------|-------------------------------------------------------------------------------------------------------------------------------------------------------------------------------------------------------------------------------------|----------------------------|---|---|---|---|
|                     |             |                                                                                                                                                                                                                                     | 1                          | 2 | 3 | 4 | 5 |
| ITEM 1<br>SOBREVIDA | Suficiencia | Los enunciados contenidos en el ítem 1 de la escala PCFS en la dimensión <b>sobrevida</b> son suficientes para evaluar el constructo.                                                                                               |                            |   |   |   |   |
|                     | Claridad    | El lenguaje utilizado en el ítem 1 de la escala PCFS en la dimensión <b>sobrevida</b> es claro y se comprender fácilmente por el profesional, es decir utiliza una semántica y sintaxis adecuada.                                   |                            |   |   |   |   |
|                     | Coherencia  | El ítem 1 contenido en la escala PCFS es coherente y tiene una relación lógica con la dimensión <b>sobrevida</b> .                                                                                                                  |                            |   |   |   |   |
|                     | Relevancia  | El ítem 1 contenido en la escala PCFS es importante y relevante de ser evaluado.                                                                                                                                                    |                            |   |   |   |   |
| ITEM 2              | Suficiencia | Los enunciados contenidos en el ítem 2 de la escala PCFS en la dimensión <b>cuidado constante</b> son suficientes para evaluar el constructo.                                                                                       |                            |   |   |   |   |
|                     | Claridad    | El lenguaje utilizado en el ítem 2 de la escala PCFS en la dimensión <b>cuidado constante</b> es claro y se comprender fácilmente por el profesional, es decir utiliza una semántica y sintaxis adecuada                            |                            |   |   |   |   |
|                     | Coherencia  | El ítem 2 contenido en la escala PCFS es coherente y tiene una relación lógica con la dimensión <b>cuidado constante</b>                                                                                                            |                            |   |   |   |   |
|                     | Relevancia  | El ítem 2 contenido en la escala PCFS es importante y relevante de ser evaluado                                                                                                                                                     |                            |   |   |   |   |
| ITEM 3              | Suficiencia | Los enunciados contenidos en el ítem 3 de la escala PCFS en la dimensión <b>actividades básicas de la vida diaria (ABVD)</b> son suficientes para evaluar el constructo.                                                            |                            |   |   |   |   |
|                     | Claridad    | El lenguaje utilizado en el ítem 3 de la escala PCFS en la dimensión <b>actividades básicas de la vida diaria (ABVD)</b> es claro y se comprender fácilmente por el profesional, es decir utiliza una semántica y sintaxis adecuada |                            |   |   |   |   |
|                     | Coherencia  | El ítem 3 contenido en la escala PCFS es coherente y tiene una relación lógica con la dimensión <b>actividades básicas</b>                                                                                                          |                            |   |   |   |   |

|        |             |                                                                                                                                                                                                                                           |  |  |  |  |  |
|--------|-------------|-------------------------------------------------------------------------------------------------------------------------------------------------------------------------------------------------------------------------------------------|--|--|--|--|--|
|        |             | <b>de la vida diaria (ABVD).</b>                                                                                                                                                                                                          |  |  |  |  |  |
|        | Relevancia  | El ítem 3 contenido en la escala PCFS es importante y relevante de ser evaluado                                                                                                                                                           |  |  |  |  |  |
| ITEM 4 | Suficiencia | Los enunciados contenidos en el ítem 4 de la escala PCFS en la dimensión <b>actividades instrumentales de la vida diaria (AIVD)</b> son suficientes para evaluar el constructo.                                                           |  |  |  |  |  |
|        | Claridad    | El lenguaje utilizado en el ítem 4 de la escala PCFS en la dimensión <b>actividades instrumentales de la vida diaria (AIVD)</b> es claro y se comprende fácilmente por el profesional, es decir utiliza una semántica y sintaxis adecuada |  |  |  |  |  |
|        | Coherencia  | El ítem 4 contenido en la escala PCFS es coherente y tiene una relación lógica con la dimensión <b>actividades instrumentales de la vida diaria (AIVD)</b>                                                                                |  |  |  |  |  |
|        | Relevancia  | El ítem 4 contenido en la escala PCFS es importante y relevante de ser evaluado                                                                                                                                                           |  |  |  |  |  |
| ITEM 5 | Suficiencia | Los enunciados contenidos en el ítem 5 de la escala PCFS en la dimensión <b>participación en roles sociales habituales</b> son suficientes para evaluar el constructo.                                                                    |  |  |  |  |  |
|        | Claridad    | El lenguaje utilizado en el ítem 5 de la escala PCFS en la dimensión <b>participación en roles sociales habituales</b> es claro y se comprende fácilmente por el profesional, es decir utiliza una semántica y sintaxis adecuada          |  |  |  |  |  |
|        | Coherencia  | El ítem 5 contenido en la escala PCFS es coherente y tiene una relación lógica con la dimensión <b>participación en roles sociales habituales</b>                                                                                         |  |  |  |  |  |
|        | Relevancia  | El ítem 5 contenido en la escala PCFS es importante y relevante de ser evaluado                                                                                                                                                           |  |  |  |  |  |
| ITEM 6 | Suficiencia | Los enunciados contenidos en el ítem 6 de la escala PCFS en la dimensión <b>lista de chequeo de síntomas</b> son suficientes para evaluar el constructo.                                                                                  |  |  |  |  |  |
|        | Claridad    | El lenguaje utilizado en el ítem 6 de la escala PCFS en la dimensión <b>lista de chequeo de síntomas</b> es claro y se comprende fácilmente por el profesional, es decir utiliza una semántica y sintaxis adecuada                        |  |  |  |  |  |
|        | Coherencia  | El ítem 6 contenido en la escala PCFS es coherente y tiene una relación lógica con la dimensión <b>lista de chequeo de síntomas</b>                                                                                                       |  |  |  |  |  |
|        | Relevancia  | El ítem 6 contenido en la escala PCFS es importante y relevante de ser evaluado                                                                                                                                                           |  |  |  |  |  |

Observaciones: \_\_\_\_\_

\_\_\_\_\_
