# Supplementary material
Source: PubMed Central journal article supplement (PMC8324401)
Supplement: mmc2.pdf [file mmc2.pdf]

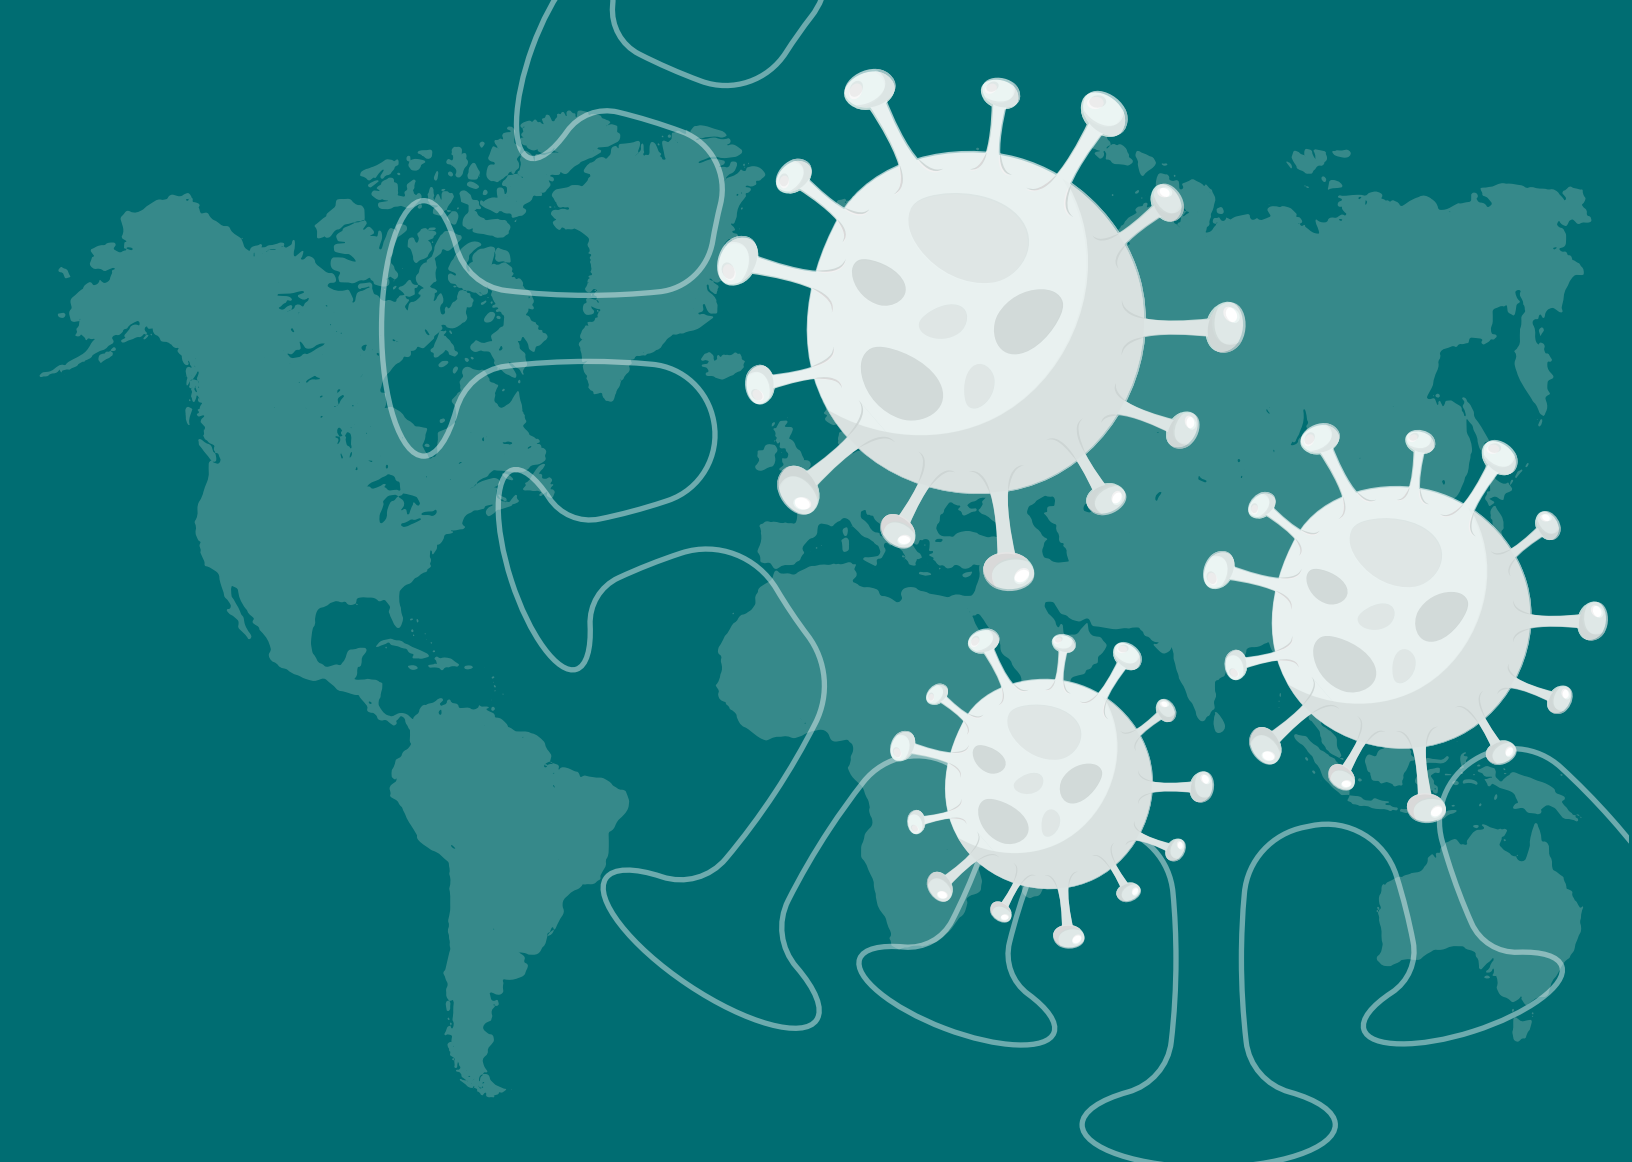

# MANUAL DE APLICACIÓN

ESCALA DE ESTADO FUNCIONAL POST -COVID 19  
VERSIÓN EN ESPAÑOL (CHILE)

# **MANUAL DE APLICACIÓN**

**ESCALA DE ESTADO FUNCIONAL POST - COVID 19 (PCFS)**  
**Versión en español (Chile)**

### **Elaboración:**

#### **Luz Alejandra Lorca P.**

Kinesiólogo

Pontificia Universidad Católica de Chile

Magister en Educación Universitaria

Instructor CIF /OMS-OPS

contacto: alejandra lorcap@gmail.com / llorcap@hsalvador.cl

#### **Paulina Benavente G.**

Kinesiólogo

Universidad de Chile

Master of Rehabilitation Counselling

Instructor CIF /OMS-OPS

#### **Marta Pizarro H.**

Kinesiólogo

Universidad de Antofagasta

Diplomado en Habilidades Directivas para la Gestión de Calidad .

Diplomado en Gerencia Estratégica en Salud.

Diplomado en Reeducción Pelviperineal

### **Colaboradores:**

Rodrigo Torres C.

Belgica San Cristóbal R.

Karrien Mansukhani

Sonia Pooja Mans Mansukhani

# Contenidos

| CONTENIDOS                                   | Página |
|----------------------------------------------|--------|
| Presentación                                 | 4-5    |
| Agradecimientos                              | 6      |
| Introducción                                 | 7-9    |
| Instrucciones generales                      | 10-11  |
| Descripción de grados de la escala           | 12-14  |
| Escala PCFS                                  | 14     |
| Entrevista estructurada Escala post COVID 19 | 15-20  |
| Autoreporte de la escala PCFS                | 21-24  |
| Recomendaciones                              | 25-26  |
| Bibliografía                                 | 27-28  |
| Abreviaturas - glosario                      | 29-31  |
| Anexos                                       | 32-39  |

# 1

## PRESENTACIÓN

# Presentación

La pandemia provocada por el nuevo corona virus COVID-19 que comenzó en China en diciembre del 2019 ha impactado la salud de millones de personas a nivel mundial.

Si bien sus principales efectos ocurren en el sistema respiratorio, otros sistemas como el nervioso y musculoesquelético también se ven afectados por este virus, viéndose alteradas la capacidad respiratoria y la movilidad de estos enfermos. Sumado a los efectos directos provocados por la infección, el periodo de hospitalización y en algunos casos los requerimientos de cuidado intensivo también pueden provocar desacondicionamiento cardiovascular, debilidad muscular, problemas de equilibrio, contracturas, disfagia y dolor, lo que genera secuelas que afectan la funcionalidad y calidad de vida de quienes sufrieron la enfermedad.

Debido a que la historia del COVID-19 es aún muy reciente, se desconoce el alcance y las consecuencias que estas secuelas puede llegar a tener, pero se sabe que en varios casos estas pueden llegar a ser significativas y provocar incluso algún grado de discapacidad transitoria o permanente. Por tales motivos creemos que una evaluación y seguimiento riguroso y personalizado, enfocado en la funcionalidad, el retorno laboral y la participación social, contribuye a optimizar los recursos necesarios para facilitar una recuperación integral.

Recientemente investigadores holandeses, han

propuesto un instrumento de evaluación funcional, la "Escala de estado funcional post-COVID-19 (PCFS)", la cual podría ser usada para el seguimiento de pacientes después de la infección por coronavirus. Esta escala evalúa las limitaciones funcionales al alta hospitalaria, 4º y 8º semanas después del alta y finalmente a los 6 meses con el objetivo de evaluar y controlar el estado funcional.

A raíz de esta propuesta, actualmente a nivel internacional se trabaja en un estudio multicéntrico para validar la escala de estado funcional post COVID 19 (PCFS) para diferentes naciones la cual permita evaluar el estado funcional, visualizar las necesidades de abordaje multidisciplinario y planificar intervención y rehabilitación.

Investigadores nacionales pertenecientes al área de la salud se han integrado al grupo de investigación internacional quienes con el apoyo y colaboración de los autores originales de la escala, recientemente han realizado la validación lingüística y adaptación transcultural de la escala PCFS para la población chilena .

Se espera que este Manual el cual presenta parte del trabajo realizado por el grupo de profesionales chilenos, permita a investigadores y profesionales sanitarios contar con una herramienta que permita estandarizar la evaluación del estado funcional y facilite el seguimiento de personas que han cursado con una infección por COVID 19.

# Agradecimientos

Agradecemos la colaboración de los autores originales de esta escala :

Dr. Frederikus A. Klok, G.J.A.M. Boon, S. Barco, M. Endres, J.J.M. Geelhoed, S. Knauss, S.A. Rezek, M.A. Spruit, J. Vehreschild y Bob Siegerink. quienes revisaron y autorizaron esta versión al español para Chile .

ID:DOI 10.17605 / OSF.IO / QGPDV

URL es <https://osf.io/qgpdv/>

# 2

---

## INTRODUCCIÓN



# Introducción

En diciembre de 2019, en Wuhan, China fue identificada con un grupo de neumonía de etiología desconocida. En febrero, se declaró una pandemia mundial de una nueva enfermedad altamente contagiosa llamada COVID-19 resultante de la infección por coronavirus (síndrome respiratorio agudo severo (SARS) –Cov-2). El COVID-19 se ha convertido en un problema mundial de salud pública, con aproximadamente el 20% de los pacientes infectados que requieren hospitalización y el 6% en cuidados críticos y que necesitan asistencia respiratoria invasiva. Los primeros informes epidemiológicos mostraron que cerca del 8% del total de casos presentaron insuficiencia respiratoria rápida y progresiva, similar al síndrome de dificultad respiratoria aguda (SDRA), y que sus métodos de tratamiento van desde la ventilación mecánica hasta la oxigenación por membrana extracorpórea.

La debilidad muscular es una de las secuelas más frecuentes en la Unidad de Cuidados Intensivos (UCI) y a menudo se genera debido a condiciones críticas que representan un riesgo vital. La debilidad adquirida en la unidad de cuidados intensivos (ICUAW) es un factor relacionado con la debilidad muscular con una prevalencia cercana al 40%, en personas que sobreviven a una enfermedad crítica. La literatura ha demostrado que los sobrevivientes de la UCI experimentan una marcada discapacidad y deficiencias en la función física y cognitiva que incluso pueden persistir durante años después de su estadía inicial en la UCI. Por lo tanto, los sobrevivientes tienen secuelas físicas y psicológicas a largo plazo que afectan su calidad de vida por hasta 5 años desde el momento de su enfermedad crítica y el 48% de los pacientes no regresan a trabajar 1 año después del alta y ese 32% de los pacientes mueren dentro de los 5 años.

Los adultos mayores que sobreviven tienen actividades limitadas de la vida diaria (AVD), alcanzando limitacio-

nes más significativas en las AVD básicas, como caminar o bañarse. La discapacidad en las AVD se asocia con gastos de atención médica más sustanciales, más hospitalizaciones, mayor riesgo de institucionalización y mayores tasas de mortalidad.

La experiencia reciente de COVID-19 ha revelado la necesidad de un enfoque de rehabilitación, especialmente para aquellos pacientes con enfermedad grave. Debido a la alta prevalencia, junto con las secuelas, es necesario evaluar a estos pacientes con herramientas objetivas para establecer objetivos realistas y determinar la mejor intervención para cada uno de ellos. Hasta ahora, pocos estudios han realizado evaluaciones de capacidad funcional. Amant-Santos et al, utilizaron el índice de Barthel para evaluar la capacidad funcional, mientras Liu et al, utilizaron la medida de independencia funcional (FIM) para evaluar el efecto de un programa de rehabilitación respiratoria en 36 sujetos con infección post-COVID-19.

Recientemente, se propuso una nueva escala de evaluación funcional, la “Escala de estado funcional post-COVID-19 (PCFS)” que podría usarse para el seguimiento de pacientes después de la infección. Esta escala evaluó las limitaciones funcionales al alta hospitalaria, 4 y 8 semanas después del alta para controlar la recuperación directa, y a los 6 meses para evaluar las consecuencias funcionales y determinar el grado de discapacidad que estos pacientes pueden tener. El PCFS es una escala ordinal que se centra en aspectos relevantes de la vida diaria para capturar la heterogeneidad de los resultados posteriores a COVID-19. Los pacientes se clasifican en categorías significativas que se pueden utilizar para realizar un seguimiento de la mejora a lo largo del tiempo y ayudar a definir la efectividad de la terapia en los resultados funcionales posteriores a Covid-19, ya sea como resultado de la infección específica.

El gran número de pacientes con SDRA en riesgo de desarrollar consecuencias a largo plazo que necesitarán equipos de rehabilitación multidisciplinares capacitados y preparados nos obliga a desarrollar y verificar que las herramientas de evaluación que utilizamos sean las más apropiadas y así podremos implementar las mejores prácticas para mejorar la funcionalidad y la calidad de vida a largo plazo de estos pacientes.

### UNA ESCALA PARA CUANTIFICAR EL RESULTADO FUNCIONAL ACTUAL EN PACIENTES CON COVID-19.

La escala de estado funcional (PCFS) post-COVID-19 (Tabla 1) se enfoca en aspectos relevantes de la vida diaria durante el seguimiento después de la infección. La escala está destinada a ayudar a los usuarios a darse cuenta de las limitaciones funcionales actuales en pacientes con COVID-19, ya sea como resultado de una infección específica, y para determinar objetivamente este grado de discapacidad. Como tal, la escala no está destinada a reemplazar otros instrumentos relevantes para medir la calidad de vida, el cansancio o la disnea, sino que está desarrollada para ser usada como una herramienta adicional para evaluar las últimas consecuencias de COVID-19 en el estado funcional. Esto ayudará a demarcar terapias COVID-19 efectivas e inefectivas sobre resultados funcionales en un entorno experimental, así como allanar el camino para una atención médica basada en valores.

Recientemente, un grupo propuso una escala ordinal para la evaluación de las limitaciones funcionales relevantes para el paciente después de un episodio de tromboembolismo venoso (TEV): la escala del estado funcional post-TEV (PVFS) (Boon GJAM et al.2020, Thromb Res; Klok FA et al. al.2019, Thromb Res). Esta escala fue desarrollada después de la revisión de la literatura y la discusión con expertos internacionales a través de un análisis Delphi y con pacientes a través de

grupos focales. Como resultado, se logró una concordancia inter-observador buena a excelente en la escala de asignación de calificaciones entre los valores autoinformados y los evaluadores independientes. Una escala ligeramente adaptada para COVID-19 podría ser de gran utilidad para determinar la recuperación funcional, más allá de los resultados binarios como la mortalidad, en estos pacientes (Klok et al. 2020, ERJ).

# 3

---

## INSTRUCCIONES GENERALES

# Instrucciones Generales

## CARACTERÍSTICAS DE LA ESCALA PCFS

La escala es ordinal, tiene 6 pasos que van desde 0 (sin síntomas) a 5 (muerte, D), y cubre todo el rango de resultados funcionales al enfocarse en las limitaciones en las tareas/ actividades habituales, ya sea en el hogar o en el trabajo / estudio, así como cambios en el estilo de vida. Las calificaciones de la escala son intuitivas y tanto los médicos como los pacientes pueden comprenderlas fácilmente.

## SINCRONIZACIÓN

El estado funcional post-COVID-19 está destinado a ser evaluado 1) en el momento del alta del hospital, 2) en las primeras semanas después del alta para controlar la recuperación directa, por ejemplo, a las 4 y 8 semanas después del alta, y 3) 6 meses después del diagnóstico de COVID-19 para evaluar el grado de discapacidad persistente. Proporcionar un valor de referencia (Grado pre COVID-19) es opcional y permitirá medir el cambio de estado. Para medir este estado funcional pre-COVID-19, la evaluación del estado funcional debe referirse al estado un mes antes de la infección. Al preguntar al paciente sobre el grado anterior al COVID-19, se recomienda hacer varias preguntas para determinar el cambio en el resultado funcional. La evaluación del estado funcional pre-COVID - 19 debe ir precedida de la primera evaluación del estado funcional actual.

## PROCEDIMIENTO

La escala de estado funcional post-COVID-19 puede ser evaluada por expertos médicos o entrevistadores capacitados durante una breve entrevista estructurada, o puede ser auto informada por el paciente.

La calificación adecuada de la escala PCFS por el propio paciente se puede hacer utilizando el cuestionario del paciente (Tabla 2) y un diagrama de flujo simple (Figura 1). En el contexto de los ensayos clínicos, se recomienda utilizar la entrevista estructurada, ya que está diseñada para reducir aún más la subjetividad y el sesgo entre los evaluadores.

Para cualquier tipo de recopilación de datos, se incentiva a los evaluadores a basar sus calificaciones en la capacidad del paciente para realizar la actividad en lugar de si el paciente realmente realiza la actividad actualmente. Esto evita una sobreestimación de la gravedad de los síntomas en pacientes que han optado por abandonar o que simplemente nunca realizaron ciertas actividades en el curso del diagnóstico de COVID-19.

# 4

---

## DESCRIPCIÓN GENERAL DE CADA GRADO DE LA ESCALA

# Descripción general de cada grado de la escala

## DESCRIPCIÓN GENERAL DE CADA GRADO DE ESCALA

**El grado 0** representa la ausencia de cualquier limitación funcional. Los grados 1 y 2 corresponden a una condición para la cual las tareas / actividades habituales podrían llevarse a cabo, definidas como cualquier actividad que los pacientes realicen mensualmente o con mayor frecuencia, ya sea en el hogar o en el trabajo / estudio. Es importante destacar que esto incluye deportes y actividades sociales.

Específicamente, **El Grado 1** está reservado para pacientes con algunos síntomas, que sin embargo no prohíben ni limitan las actividades habituales.

**El Grado 2** está reservado para pacientes que pueden realizar de forma independiente todas las actividades habituales pero a una intensidad menor, a veces combinada con limitaciones leves en la participación en los roles sociales habituales.

**El Grado 3** describe las limitaciones funcionales moderadas que obligan a los pacientes a modificar estructuralmente las actividades habituales, lo que refleja la incapacidad para realizar ciertas actividades que, por lo tanto, deben ser asumidas por otros. Esos pacientes pueden necesitar asistencia en actividades instrumentales de la vida diaria (AIVD), por ejemplo, el manejo de tareas domésticas básicas, la movilidad comunitaria, la compra de alimentos o artículos de primera necesidad o la participación en roles sociales habituales está restringida.

**El Grado 4** describe a aquellos pacientes con limitaciones funcionales severas que requieren asistencia con actividades de la vida diaria (AVD), no necesariamente administrados por una enfermera certificada. Debe indicarse que es esencial la asistencia con algunas AVD,

por ejemplo, el uso del baño, la rutina de aseo diario y la movilidad funcional. La participación en roles sociales habituales está probablemente restringida. El fallecimiento de un paciente se registra en el grado F, y es principalmente relevante en el contexto de la investigación clínica y el control de calidad.

Tabla 1: Escala de estado funcional Post –COVID–19

| Grado de la escala PCFS + descripción                                                                                                                                                                                                         | Sección de la entrevista estructurada                                                                                                                                                                |
|-----------------------------------------------------------------------------------------------------------------------------------------------------------------------------------------------------------------------------------------------|------------------------------------------------------------------------------------------------------------------------------------------------------------------------------------------------------|
| <p><b>0 Sin limitaciones funcionales</b><br/>Sin síntomas, dolor, depresión o ansiedad</p>                                                                                                                                                    | <p>Lista de chequeo de síntomas</p>                                                                                                                                                                  |
| <p><b>Limitación funcional no significativa</b><br/>Todas las tareas/actividades habituales en el hogar o en el trabajo pueden llevarse a cabo con el mismo nivel de intensidad, a pesar de algunos síntomas, dolor, depresión o ansiedad</p> | <p>Lista de chequeo de síntomas</p>                                                                                                                                                                  |
| <p><b>Limitación funcional leve</b><br/>Las tareas/actividades habituales en el hogar o en el trabajo se llevan a cabo con un nivel de intensidad más bajo u ocasionalmente se evitan debido a síntomas, dolor, depresión o ansiedad.</p>     | <p>Participación en roles sociales habituales. (capaz de realizar de manera independiente todos las tareas/actividades, aun cuando en ocasiones sea necesario ajustar el tiempo o la frecuencia)</p> |
| <p><b>Limitación funcional moderada</b><br/>Las tareas/actividades habituales en el hogar o en el trabajo se han modificado estructuralmente (reducido) debido a los síntomas, dolor, depresión o ansiedad.</p>                               | <p>Actividades Instrumentales de la Vida Diaria; participación en roles sociales habituales (incapacidad para realizar ciertas tareas/actividades las cuales son asumidas por otros)</p>             |
| <p><b>Limitación funcional severa</b><br/>Asistencia necesaria en actividades de la vida diaria debido a síntomas, dolor, depresión o ansiedad: se requieren cuidados y atención de enfermería.</p>                                           | <p>Cuidado constante; AVD; AIVD; participación en roles sociales habituales.</p>                                                                                                                     |
| <p><b>F Fallecido</b></p>                                                                                                                                                                                                                     |                                                                                                                                                                                                      |

# 5

---

## ENTREVISTA ESTRUCTURADA DE LA ESCALA DE ESTADO FUNCIONAL POST-COVID-19



# Entrevista estructurada de la escala de estado funcional post-COVID-19

La entrevista estructurada en el marco de ensayos clínicos facilita la asignación objetiva de los grados de escala para los pacientes. Idealmente, la información debe obtenerse principalmente del paciente y / o de un amigo cercano o cuidador (representante) que esté familiarizado con la rutina diaria del paciente. Si el paciente carece de información sobre algunas preguntas o si las respuestas son inconsistentes, puede ser útil entrevistar a un cuidador o pariente de forma independiente. Las preguntas estandarizadas cubren 5 secciones correspondientes a los distintos niveles de discapacidad (Tabla 1). Sin embargo, se recomienda hacer preguntas más allá de las indicadas para garantizar que el paciente haya comprendido el significado de la pregunta y aclarar aún más sus respuestas. Además, se recomienda adaptar la estrategia de entrevista de acuerdo con el estado del paciente y sus respuestas. Las preguntas abiertas pueden ser una excelente manera de comenzar la entrevista, durante la cual se obtendrá información clave útil para calificar a los pacientes. Más tarde, las preguntas más específicas o incluso cerradas pueden ayudar a hacer una distinción clara entre los grados contiguos.

## INSTRUCCIONES

Marque las casillas correspondientes y responda a todas las preguntas. Verifique la consistencia a medida que avance, las respuestas a preguntas posteriores pueden sugerir una revisión de las respuestas anteriores. Las limitaciones o los síntomas pueden variar con el tiempo, la medición se refiere a la situación promedio de la semana pasada (excepto cuando se evalúa al alta, en ese caso se refiere a la situación del día del alta).

La calificación correspondiente de la escala PCFS se entrega en la columna junto a cada respuesta específica. En caso de que dos calificaciones parezcan apropiadas, se asignara al paciente la calificación más alta con las “mayores” limitaciones.

## EVALUACIÓN DE LA ESCALA

|                                              |                                                                                                                                                     |
|----------------------------------------------|-----------------------------------------------------------------------------------------------------------------------------------------------------|
| <b>Nombre / ID paciente</b>                  |                                                                                                                                                     |
| <b>Fecha de diagnóstico de COVID-19</b>      |                                                                                                                                                     |
| <b>Fecha de evaluación de la escala PCFS</b> |                                                                                                                                                     |
| <b>Lugar</b>                                 | Al alta<br>Visita ambulatoria a las 4 semanas<br>Visita ambulatoria a las 8 semanas<br>Visita ambulatoria a los 6 meses<br>Otra (especifique) _____ |
| <b>Encuestado</b>                            | Paciente<br>Paciente y otra persona<br>Sólo otra persona<br>Especifique _____                                                                       |
| <b>Evaluador</b>                             | Médico<br>Personal del estudio                                                                                                                      |

## ENTREVISTA ESTRUCTURADA

| <b>1. SOBREVIDA</b>                                                | <b>Calificación correspondiente en la escala PCFS si respuesta es "SI"</b> |
|--------------------------------------------------------------------|----------------------------------------------------------------------------|
| 1.1 ¿Ha fallecido el paciente después del diagnóstico de COVID-19? | D                                                                          |

| <b>2. CUIDADO CONSTANTE</b><br><i>Explicación:</i> significa que alguien más debe estar a su disposición todo el tiempo. El cuidado puede ser proporcionada por un cuidador entrenado o no entrenado. El paciente generalmente estará postrado en la cama y puede tener incontinencia. | <b>Calificación correspondiente en escala PCFS si respuesta es "SI"</b> |
|----------------------------------------------------------------------------------------------------------------------------------------------------------------------------------------------------------------------------------------------------------------------------------------|-------------------------------------------------------------------------|
| 2.1 ¿Requiere usted cuidados contantes?                                                                                                                                                                                                                                                | 4                                                                       |

| <b>3. ACTIVIDADES BÁSICAS DE LA VIDA DIARIA (ABVD)</b><br><i>Explicación:</i> la asistencia incluye la ayuda física, instrucción verbal o supervisión de otra persona. Puede considerarse esencial cuando hay una necesidad de ayuda física (por parte de otra persona) con una actividad o para supervisión, o cuando el paciente necesita indicaciones o recordatorios para realizar una tarea. La necesidad de supervisión por razones de seguridad debería obedecer a un peligro objetivo que se presenta, y no "por si acaso". | <b>Calificación correspondiente en escala PCFS si respuesta es "SI"</b> |
|-------------------------------------------------------------------------------------------------------------------------------------------------------------------------------------------------------------------------------------------------------------------------------------------------------------------------------------------------------------------------------------------------------------------------------------------------------------------------------------------------------------------------------------|-------------------------------------------------------------------------|
| <b>3.1 ¿Es esencial para usted la asistencia para comer?</b><br>(Comer sin ayuda: la comida y los utensilios pueden ser proporcionados por otros)                                                                                                                                                                                                                                                                                                                                                                                   | 4                                                                       |
| <b>3.2 ¿Es esencial para usted la asistencia para usar el baño?</b><br>(Usar el baño sin ayuda: llegar al baño/inodoro; desvestirse lo suficiente; limpiarse; vestirse y salir)                                                                                                                                                                                                                                                                                                                                                     | 4                                                                       |

|                                                                                                                                                                                                                                                                                                                               |                 |
|-------------------------------------------------------------------------------------------------------------------------------------------------------------------------------------------------------------------------------------------------------------------------------------------------------------------------------|-----------------|
| <p><b>3.3 ¿Es esencial para usted la asistencia para la rutina de higiene diaria?</b><br/>(La rutina de higiene incluye sólo lavarse la cara, peinarse, lavarse los dientes y colocarse la dentadura postiza. Los implementos pueden ser proporcionados por otros sin considerar esto como asistencia)</p>                    | <p><b>4</b></p> |
| <p><b>3.4 ¿Es esencial para usted la asistencia para caminar?</b><br/>(Caminar sin asistencia: si es absolutamente necesario, es capaz de caminar en el interior o alrededor de la casa o sala, puede utilizar cualquier ayuda, sin embargo, no requiere ayuda física o instrucción verbal o supervisión de otra persona)</p> | <p><b>4</b></p> |

|                                                                                                                                                                                                                                                                                                                                                                                                                                                                                                                                                    |                                                                                |
|----------------------------------------------------------------------------------------------------------------------------------------------------------------------------------------------------------------------------------------------------------------------------------------------------------------------------------------------------------------------------------------------------------------------------------------------------------------------------------------------------------------------------------------------------|--------------------------------------------------------------------------------|
| <p><b>4. ACTIVIDADES INSTRUMENTALES DE LA VIDA DIARIA (AIVD)</b><br/><i>Explicación:</i> la asistencia incluye la ayuda física, instrucción verbal o supervisión de otra persona. Puede considerarse esencial cuando hay una necesidad de ayuda física (por parte de otra persona) con una actividad o para supervisión, o cuando el paciente necesita indicaciones o recordatorios para realizar una tarea. La necesidad de supervisión por razones de seguridad debería obedecer a un peligro objetivo que se presenta, y no "por si acaso".</p> | <p><b>Calificación correspondiente en escala PCFS si respuesta es "SI"</b></p> |
| <p><b>4.1 ¿Es esencial para usted la asistencia para las tareas domésticas básicas que son importantes para la vida diaria?</b><br/>(Por ejemplo: preparar una comida sencilla, lavar los platos, sacar la basura; excluya tareas que no necesitan ser realizadas todos los días)</p>                                                                                                                                                                                                                                                              | <p><b>4</b></p>                                                                |
| <p><b>4.2 ¿Es esencial para usted la asistencia para los viajes locales?</b><br/>(Viajes locales sin asistencia: el paciente puede conducir o utilizar el transporte público para desplazarse. La posibilidad de utilizar un taxi es suficiente, siempre que el paciente pueda llamar e indicarle al conductor)</p>                                                                                                                                                                                                                                | <p><b>4</b></p>                                                                |
| <p><b>4.3 ¿Es esencial para usted la asistencia para las compras locales?</b><br/>(El paciente no es capaz de comprar alimentos o artículos de primera necesidad por sí mismo)</p>                                                                                                                                                                                                                                                                                                                                                                 | <p><b>3</b></p>                                                                |

| <p><b>5. PARTICIPACIÓN EN ROLES SOCIALES HABITUALES</b></p> <p><i>Explicación:</i> esta sección se refiere al disminución en el cumplimiento de los principales roles sociales (no las circunstancias sociales o financieras).</p>                                                                                                                                                                                                                                                                                                                                       | <p><b>Calificación correspondiente en escala PCFS si respuesta es "SI"</b></p> |
|--------------------------------------------------------------------------------------------------------------------------------------------------------------------------------------------------------------------------------------------------------------------------------------------------------------------------------------------------------------------------------------------------------------------------------------------------------------------------------------------------------------------------------------------------------------------------|--------------------------------------------------------------------------------|
| <p><b>5.1 ¿Es esencial adaptar las tareas/actividades en el hogar o en el trabajo/estudio porque usted no puede realizarlas por sí mismo (por ejemplo, produciendo un cambio en el nivel de responsabilidad, un cambio de de tiempo completo a tiempo parcial en el trabajo, o un cambio en la educación)?</b></p> <p>(El trabajo se refiere tanto al empleo remunerado como al trabajo voluntario. Las adaptaciones especiales que permiten a alguien volver a trabajar, aunque normalmente no podría hacerlo, deben considerarse como una adaptación del trabajo).</p> | <p><b>3</b></p>                                                                |
| <p><b>5.2 ¿Necesita usted ocasionalmente evitar o reducir las tareas/actividades en el hogar o en el trabajo/estudio o necesita extenderlas a lo largo del tiempo (aunque básicamente usted sea capaz de realizar todas esas actividades)?</b></p>                                                                                                                                                                                                                                                                                                                       | <p><b>2</b></p>                                                                |
| <p><b>5.3 ¿Ya no puede cuidar bien de sus seres queridos como antes?</b></p> <p>(Cuidar bien incluye cuidar a su pareja, padres, nietos u otras personas dependientes).</p>                                                                                                                                                                                                                                                                                                                                                                                              | <p><b>3</b></p>                                                                |
| <p><b>5.4 Desde el diagnóstico de COVID-19, ¿Ha tenido problemas en sus relaciones o se ha aislado?</b></p> <p>(Estos problemas incluyen problemas de comunicación, dificultades en las relaciones con las personas en casa o en el trabajo/estudio, pérdida de amistades, aumento del aislamiento, etc.)</p>                                                                                                                                                                                                                                                            | <p><b>3</b></p>                                                                |
| <p><b>5.5 ¿Está restringida su participación en actividades sociales y de ocio?</b></p> <p>(Incluye pasatiempos e intereses, incluyendo ir a un restaurante, bar, cine, salir a caminar, juegos, lectura de libros, etc.)</p>                                                                                                                                                                                                                                                                                                                                            | <p><b>2</b></p>                                                                |

| <p><b>6. LISTA DE CHEQUEO DE SÍNTOMAS</b></p> <p><i>Explicación:</i> estos pueden ser cualquier síntoma o problema informado por los pacientes o encontrado en el examen físico. Los síntomas incluyen, pero no se limitan a: disnea, dolor, fatiga, debilidad muscular, pérdida de memoria, depresión y ansiedad.</p> | <p><b>Calificación correspondiente en escala PCFS si respuesta es “SI”</b></p> |
|------------------------------------------------------------------------------------------------------------------------------------------------------------------------------------------------------------------------------------------------------------------------------------------------------------------------|--------------------------------------------------------------------------------|
| <p><b>6.1 ¿Presenta usted síntomas por los cuales se deben evitar, reducir o extender las tareas/actividades habituales a lo largo del tiempo?</b></p>                                                                                                                                                                 | <p><b>2</b></p>                                                                |
| <p><b>6.2 ¿Presenta usted algún síntoma, resultante de COVID-19, sin experimentar limitaciones funcionales?</b></p>                                                                                                                                                                                                    | <p><b>1</b></p>                                                                |
| <p><b>6.3 ¿Tiene usted problemas para relajarse o experimenta el COVID-19 como un trauma?</b></p> <p>(‘Trauma’ es definido como: sufrir recuerdos intrusivos, recuerdos recurrentes o respuestas evitativas, asociadas a haber experimentado el COVID-19.)</p>                                                         | <p><b>1</b></p>                                                                |

### ASIGNACIÓN DE LA CALIFICACIÓN EN LA ESCALA DE ESTADO FUNCIONAL POST-COVID-19

La clasificación general es simplemente el peor estado funcional indicado por las respuestas del paciente (la calificación más alta corresponde a la mayor cantidad de limitaciones. Si un paciente no tiene limitaciones o síntomas, entonces la calificación correspondiente en la escala es 0.

|                                                                  |
|------------------------------------------------------------------|
| <p><b>Calificación final de la Escala PCFS:</b></p> <p>_____</p> |
|------------------------------------------------------------------|

¿Cuál era su grado en la escala PCFS antes del COVID-19? \_\_\_\_\_

# 6

---

## **CUESTIONARIO DEL PACIENTE PARA AUTO REPORTE DEL ESTADO FUNCIONAL POST-COVID-19 (PCFS)**

# Mida usted mismo el impacto del COVID-19 en su vida: Manual para la escala de estado funcional de pacientes Post-COVID-19 (PCFS)

Para indicar y discutir su estado funcional actual, usted puede usar el diagrama de flujo (Figura 1) y el cuestionario del paciente (Tabla 2), ambos pertenecientes a la Escala de estado funcional post-COVID-19.

Esta escala (PCFS) cubre todo el rango de resultados funcionales al enfocarse en las limitaciones de las áreas / actividades habituales en el hogar o en el trabajo / estudio, así como cambios en el estilo de vida. En las actividades deportivas y sociales también están incluidas.

Las limitaciones o síntomas pueden o no estar directamente relacionados con COVID 19 y pueden haber estado presentes durante un período de tiempo más largo. Pueden variar con el tiempo, la medición se refiere a la situación promedio de la semana pasada (excepto cuando se evalúa al alta, en ese caso se refiere a la situación del día del alta).

Usted mismo puede asignar la calificación apropiada de la escala PCFS siguiendo los pasos del diagrama de flujo y marcando la casilla correcta en la tabla. En caso de que dos calificaciones parezcan apropiadas, elija siempre el grado más alto con las mayores limitaciones. Junto con su médico tratante pueden coordinar cuándo y con qué frecuencia debe medir su estado funcional. El médico tratante comparará estos resultados con la recuperación normal después de la infección. En caso de una recuperación lenta o incompleta, el médico indicará si son necesarias pruebas de diagnóstico adicionales o si pudiera iniciar el tratamiento.

Figura 1: Flujograma para auto reporte del paciente de la Escala de estado funcional post COVID19

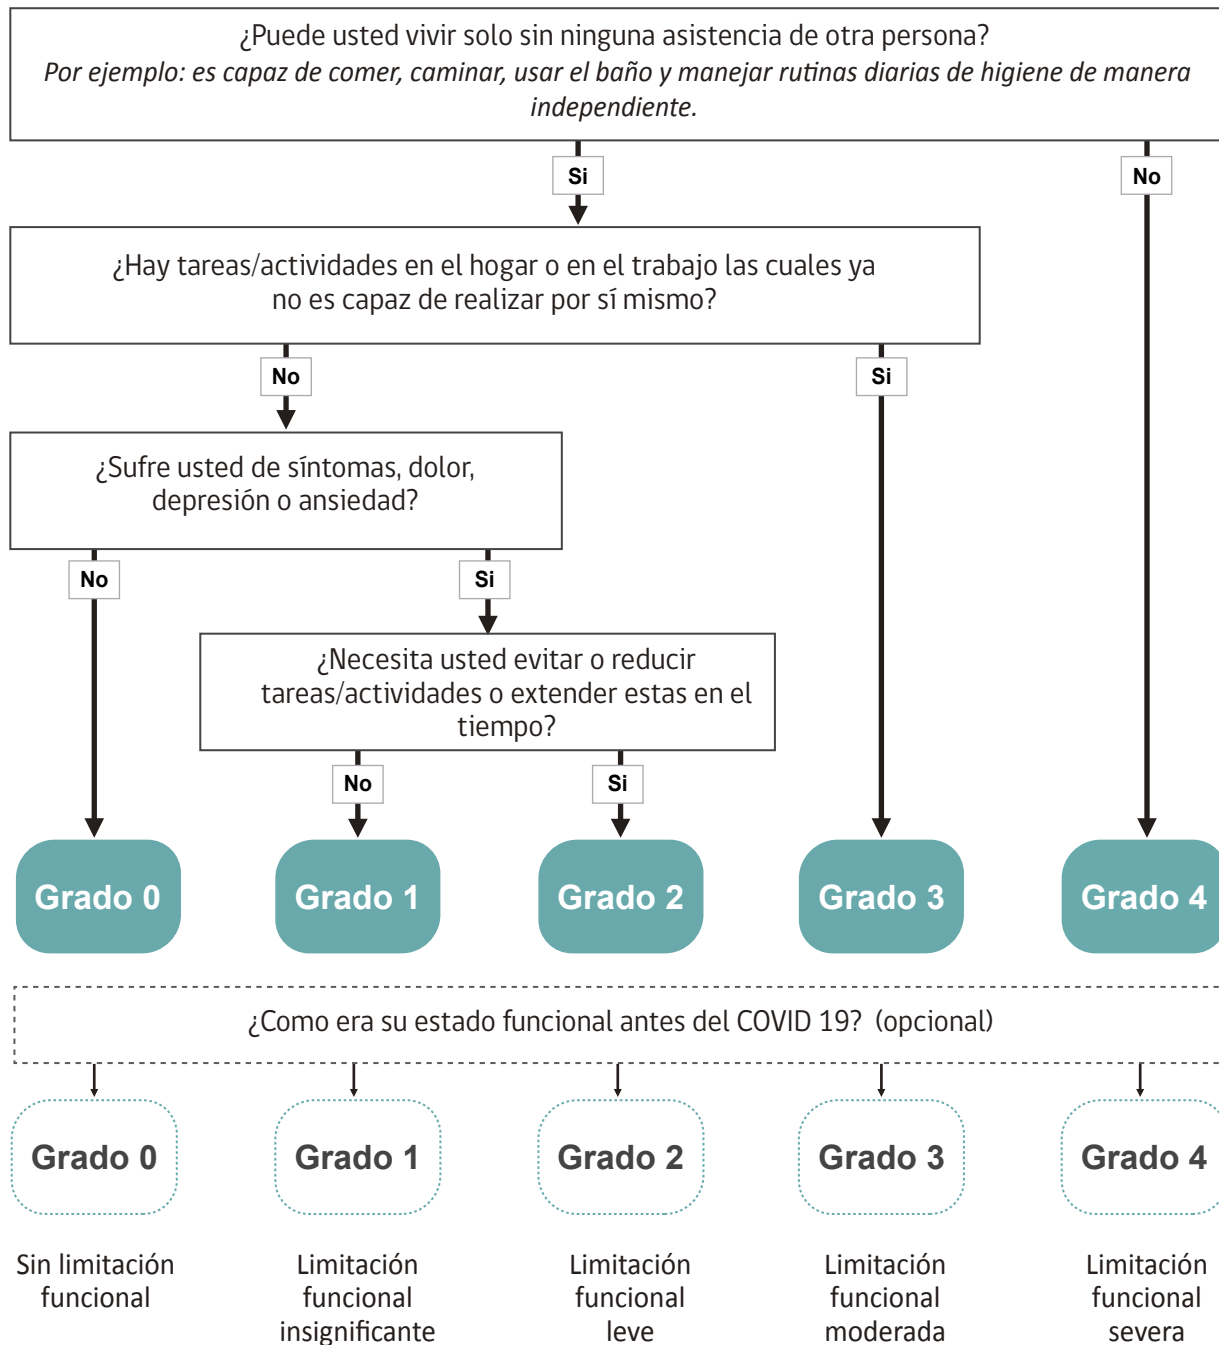



**Tabla 2: Cuestionario del paciente para auto reporte del estado funcional post-COVID-19**

| <p>¿Cuánto se ve afectada actualmente su vida diaria por el COVID-19? Por favor Indique cuál de las siguientes afirmaciones se aplica más a usted.<br/><i>Por favor, marque solo una casilla a la vez</i></p>                                                                                       |                          | <p>Calificación correspondiente de la escala PCFS<br/><i>(marque la casilla)</i></p> |
|-----------------------------------------------------------------------------------------------------------------------------------------------------------------------------------------------------------------------------------------------------------------------------------------------------|--------------------------|--------------------------------------------------------------------------------------|
| <p>No tengo una limitaciones en mi vida diaria ni síntomas de dolor, depresión o ansiedad.</p>                                                                                                                                                                                                      | <input type="checkbox"/> | <p><b>Grado 0</b></p>                                                                |
| <p>Tengo limitaciones insignificante en mi vida diaria, ya que puedo realizar todas las tareas habituales, aunque todavía tengo síntomas persistentes, dolor, depresión , ansiedad.</p>                                                                                                             | <input type="checkbox"/> | <p><b>Grado 1</b></p>                                                                |
| <p>Sufro limitaciones en mi vida diaria, ya que ocasionalmente necesito reducir o evitar tarea /actividades habituales o necesito extenderlas en el tiempo debido a los síntomas, dolor, depresión o ansiedad. Sin embargo, soy capaz de realizar todas las actividades sin ninguna asistencia.</p> | <input type="checkbox"/> | <p><b>Grado 2</b></p>                                                                |
| <p>Sufro limitaciones en mi vida diaria, ya que no soy capaz de realizar todas las tareas/actividades habituales debido a los síntomas, dolor, depresión o ansiedad. Sin embargo, soy capaz de cuidar de mí mismo sin ninguna asistencia.</p>                                                       | <input type="checkbox"/> | <p><b>Grado 3</b></p>                                                                |
| <p>Sufro limitaciones severas en mi vida diaria. No puedo cuidar de mí mismo y por lo tanto dependo de cuidados de enfermería y/o la asistencia de otra persona debido a los síntomas, dolor, depresión o ansiedad.</p>                                                                             | <input type="checkbox"/> | <p><b>Grado 4</b></p>                                                                |

# 7

---

## RECOMENDACIONES

# Recomendaciones

La escala PCFS para evaluación del estado funcional post COVID 19 no ha sido elaborada para reemplazar otros instrumentos o escalas de evaluación relevantes para evaluar diferentes dimensiones relacionadas al estado funcional de personas que han cursado por infección por COVID19. Debe ser usada como una medida de resultado adicional.

A continuación se describen otros cuestionarios e instrumentos de evaluación recomendados para complementar una evaluación integral de los pacientes que han cursado con una infección por COVID 19 en contexto ambulatorio.

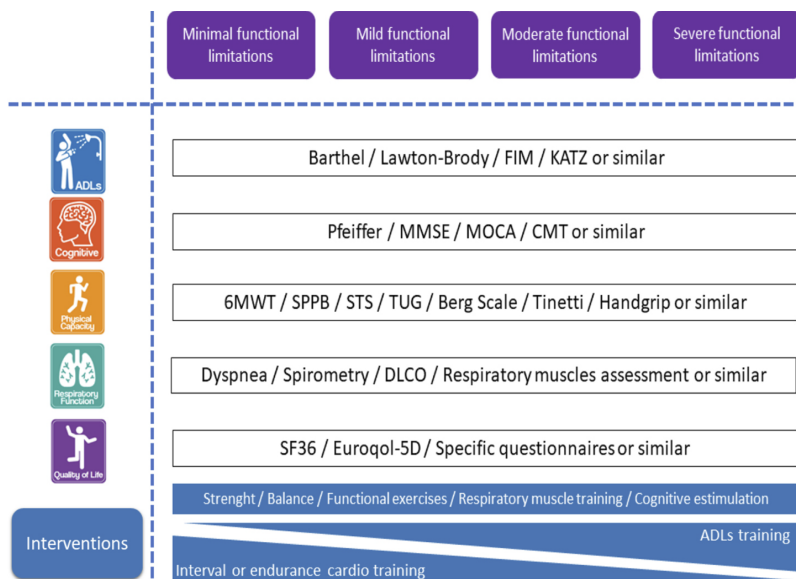

Torres-Castro R. et al. Functional limitations post-COVID-19: A comprehensive assessment strategy. Arch Bronconeumol. 2020

## Dimensión del funcionamiento y escalas de evaluación

| DIMENSIÓN                                           | ESCALA/INSTRUMENTO                                            |
|-----------------------------------------------------|---------------------------------------------------------------|
| Signos Vitales                                      | FC, FR, Sat O2, T°, PA( * ), glicemia capilar( * )            |
| Disnea                                              | Escala de BORG modificada                                     |
| Dolor                                               | Escala (EVA)                                                  |
| Función músculos respiratorios                      | Evaluación PIM-PEM                                            |
| Actividades de la vida diaria (AVD)                 | Escala de Barthel                                             |
| Actividades instrumentales de la vida diaria (AIVD) | Lawton & Brody                                                |
| Capacidad funcional                                 | Marcha estacionaria.<br>Test de 6 minutos<br>Chair stand test |
| Fuerza muscular EESS                                | Dinamometría                                                  |
| Incontinencia urinaria                              | Escala ICIQ - SF                                              |
| Fatiga                                              | FAS (fatigue assessment scale)                                |
| Función psicológica                                 | Escala de Zung (ansiedad y depresión)                         |
| Función cognitiva                                   | Mini mental test                                              |
| Calidad de Vida                                     | Escala: SF-36                                                 |
| Discapacidad                                        | WHODAS 2.0                                                    |

Zeng, B, et al. 2020

# 8

---

## BIBLIOGRAFÍA

## Bibliografía

1. Guan WJ, Ni ZY, Hu Y, Liang WH, Ou CQ, He JX, et al. Clinical Characteristics of Coronavirus Disease 2019 in China. *N Engl J Med*. 2020. <https://doi.org/10.1056/NEJMoa2002032>.
2. World Health Organisation. Novel Coronavirus 2019. 2020. Available online: <https://www.who.int/emergencies/diseases/novel-coronavirus-2019/events-as-they-happen> (accessed on 9 May 2020).
3. Jin, Y. et al. Virology, epidemiology, pathogenesis, and control of COVID-19. *Viruses* 12, 372 (2020).
4. Namendys-Silva S.A. ECMO for ARDS due to COVID-19. *Heart Lung*. 2020 Mar 26; ([Epub ahead of print].
5. Inoue S, Hatakeyama J, Kondo Y, et al. Post-intensive care syndrome: its pathophysiology, prevention, and future directions. *Acute Med Surg* 2019;6(3):233-46. doi:10.1002/ams2.415
6. Ohtake PJ, Lee AC, Scott JC, et al. Physical Impairments Associated With Post-Intensive Care Syndrome: Systematic Review Based on the World Health Organization's International Classification of Functioning, Disability and Health Framework. *Phys Ther* 2018;98(8):631-45. doi:10.1093/ptj/pzy059
7. Herridge M.S. Tansey C.M. Matté A. et al. Canadian Critical Care Trials Group. Functional disability 5 years after acute respiratory distress syndrome. *N Engl J Med*. 2011; 364: 1293-1304
8. Klok FA, Boon GJAM, Barco S, et al. The Post-COVID-19 Functional Status scale: a tool to measure functional status over time after COVID-19. *Eur Respir J* 2020; 56: 2001494 [<https://doi.org/10.1183/13993003.01494-2020>].
9. Yang L-L, Yang T. Pulmonary Rehabilitation for Patients with Coronavirus Disease 2019 (COVID-19). *Chronic Dis Transl Med*. Published online May 14, 2020. doi:10.1016/j.cdtm.2020.05.002.
10. F.A. Klok, G.J.A.M. Boon, S. Barco, M. Endres, J.J.M. Geelhoed, S. Knauss, S.A. Rezek, M.A. Spruit, J. Vehreschild, B. Siegerink. The Post-COVID-19 Functional Status (PCFS) Scale: a tool to measure functional status over time after COVID-19.
11. Marco de Trabajo para la Práctica de Terapia Ocupacional: Dominio & Proceso 3rd Edición, 2014, Asociación Americana de Terapia Ocupacional - AOTA

# 9

---

## GLOSARIO - ABREVIATURAS

## Glosario

**Pandemia:** Propagación mundial de una nueva enfermedad infecciosa. Se produce una pandemia de gripe cuando surge un nuevo virus gripal que se propaga por el mundo y la mayoría de las personas no tienen inmunidad contra él.

**COVID 19:** Sigla que corresponde a Corona Virus Disease. Es la enfermedad infecciosa causada por un tipo de coronavirus, desconocida hasta antes de que estallara en China en diciembre de 2019. Actualmente el COVID-19 es una pandemia que afecta a muchos países de todo el mundo.

**Discapacidad:** Término genérico que abarca deficiencias, limitaciones de la actividad y restricciones a la participación como resultado de una condición de salud. Se entiende por discapacidad la interacción entre las personas que padecen alguna enfermedad y los factores personales y ambientales (por ejemplo, actitudes negativas, transporte y edificios públicos inaccesibles y un apoyo social limitado).

**Estado funcional:** Nivel de actividad que puede realizar un individuo y su capacidad para llevar a cabo actividades de la vida diaria y de autocuidado. Este se utiliza para caracterizar el impacto de una enfermedad en el nivel de independencia de un individuo para realizar sus actividades

**Actividades de la vida diaria (AVD):** actividades que están orientadas al cuidado del propio cuerpo (adaptado de Rogers y Holm, 1994, págs. 181-202). AVD también se refiere a las actividades básicas de la vida diaria (ABVD) y las actividades personales de la vida diaria (APVD). Estas actividades son fundamentales para vivir en un mundo social, que permitan la supervivencia y el bienestar".

**Actividades instrumentales de la vida diaria (AIVD):** actividades de apoyo a la vida cotidiana en la casa y en la comunidad que a menudo requieren interacciones más complejas de las utilizadas en las actividades de autocuidado utilizadas en las AVD.

**Roles Sociales:** función que desempeña una persona en un determinado contexto social de acuerdo con sus expectativas y en función de su edad, sexo y factores sociales y culturales.

**PICS (Post Intensive Care Syndrome):** Síndrome caracterizado por un conjunto de alteraciones cognitivas, psiquiátricas, alteraciones de función pulmonar, dolor crónico, disfunción sexual, descondicionamiento, debilidad, neuropatía y fatiga.

# Abreviaturas

**SDRA:** Síndrome de distrés respiratorio agudo

**OMS:** Organización Mundial de la Salud

**OPS:** Organización Panamericana de la Salud

**UCI:** Unidad de Cuidado Intensivo

**ICUAW:** intensive care unit acquired weakness.  
Debilidad Muscular adquirida en unidad de Cuidado Intensivo.

**PCFS:** Post COVID-19 Functional Scale. Escala de estado Funcional post COVID-19

**SARS:** Síndrome Respiratorio Agudo Severo

**TEV:** Trombo Embolismo Venoso

**FIM:** Functional Independence Measure. Medida de Independencia funcional

**AVD:** Actividades de la Vida Diaria

**AIVD:** Actividades Instrumentales de la Vida Diaria

**PICS:** Post Intensive Care Syndrome



# 10

---

## ANEXOS

# ANEXO 1

## Anexo 1: Fases del proceso de Validación lingüística y adaptación transcultural de la Escala de estado funcional post COVID- 19 (PCFS).

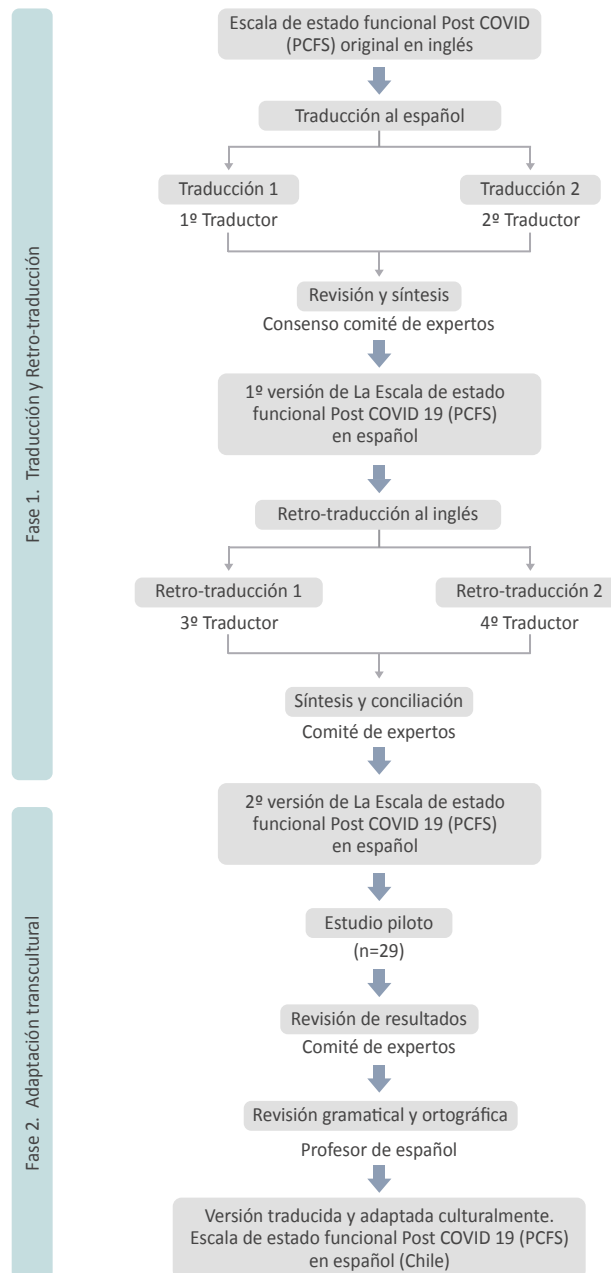

1. WHO. Process of translation and adaptation of instruments. Geneva: World Health Organization.

2. Sousa VD and Rojjanasriat W. Translation, adaptation and validation of instruments or scales for use in cross-cultural health care research: a clear and user-friendly guideline. *Journal of evaluation in clinical practice*. 2011; 17: 268-74.

**Citación Sugerida:** Lorca LA, Benavente P., Pizarro M. Manual de aplicación para la Escala de Estado Funcional Post-COVID-19. Versión español (Chile). <https://osf.io/qgpdv/>. Agosto 2020.

## ANEXO 2

Table 1: The post-COVID-19 Functional Status (PCFS) Scale

| PCFS scale grade + description                                                                                                                                                                                          | Section of the structured interview                                                                                                                                |
|-------------------------------------------------------------------------------------------------------------------------------------------------------------------------------------------------------------------------|--------------------------------------------------------------------------------------------------------------------------------------------------------------------|
| <p><b>0 No functional limitations</b></p> <p>No symptoms, pain, depression or anxiety.</p>                                                                                                                              | Symptom checklist                                                                                                                                                  |
| <p><b>1 Negligible functional limitations</b></p> <p>All usual duties/activities at home or at work can be carried out at the same level of intensity, despite some symptoms, pain, depression or anxiety.</p>          | Symptom checklist                                                                                                                                                  |
| <p><b>2 Slight functional limitations</b></p> <p>Usual duties/activities at home or at work are carried out at a lower level of intensity or are occasionally avoided due to symptoms, pain, depression or anxiety.</p> | Participation in usual social roles<br><i>(independently able to perform all duties/activities, even if occasional adjustment in tempo or frequency is needed)</i> |
| <p><b>3 Moderate functional limitations</b></p> <p>Usual duties/activities at home or at work have been structurally modified (reduced) due to symptoms, pain, depression or anxiety.</p>                               | Instrumental ADL; participation in usual social roles<br><i>(inability to perform certain duties/activities which are taken over by others)</i>                    |
| <p><b>4 Severe functional limitations</b></p> <p>Assistance needed in activities of daily living due to symptoms, pain, depression or anxiety: nursing care and attention are required.</p>                             | Constant care; basic ADL; instrumental ADL; participation in usual social roles                                                                                    |
| <p><b>D Death</b></p>                                                                                                                                                                                                   | -                                                                                                                                                                  |

\* Versión original

## ANEXO 3

Table 2: Structured interview – Post-COVID-19 Functional Status Scale,

| 1. SURVIVAL                                            | Corresponding PCFS scale grade if the answer is 'YES' |
|--------------------------------------------------------|-------------------------------------------------------|
| 1.1 Has the patient died after the COVID-19 diagnosis? | D                                                     |

| 2. CONSTANT CARE                                                                                                                                                                                      | Corresponding PCFS scale grade if the answer is 'YES' |
|-------------------------------------------------------------------------------------------------------------------------------------------------------------------------------------------------------|-------------------------------------------------------|
| Explanation: meaning someone else needs to be available at all times. Care may be provided by either trained or an untrained caregiver. The patient will usually be bedridden and may be incontinent. |                                                       |
| 2.1 Do you require constant care?                                                                                                                                                                     | 4                                                     |

| 3. BASIC ACTIVITIES OF DAILY LIVING (ADL)                                                                                                                                                                                                                                                                                                                                                                                                   | Corresponding PCFS scale grade if the answer is 'YES' |
|---------------------------------------------------------------------------------------------------------------------------------------------------------------------------------------------------------------------------------------------------------------------------------------------------------------------------------------------------------------------------------------------------------------------------------------------|-------------------------------------------------------|
| Explanation: assistance includes physical assistance, verbal instruction, or supervision by another person. It may be considered <i>essential</i> when there is a need for physical help (by another person) with an activity or for supervision, or the patient needs prompting or reminding to do a task. The need for supervision for safety reasons should be due to <i>objective danger</i> that is posed, rather than 'just in case'. |                                                       |
| 3.1 Is assistance essential for eating?<br>(Eating without assistance: food and implements may be provided by others)                                                                                                                                                                                                                                                                                                                       | 4                                                     |
| 3.2 Is assistance essential for using the toilet?<br>(Using toilet without assistance: reach toilet/commode; undress sufficiently; clean self; dress and leave)                                                                                                                                                                                                                                                                             | 4                                                     |
| 3.3 Is assistance essential for routine daily hygiene?<br>(Routine hygiene includes only washing face, doing hair, cleaning teeth/fitting false teeth. Implements may be provided by others without considering this as assistance)                                                                                                                                                                                                         | 4                                                     |
| 3.4 Is assistance essential for walking?<br>(Walking without assistance: if absolutely necessary, able to walk indoors or around house or ward, may use any aid, however not requiring physical help or verbal instruction or supervision from another person)                                                                                                                                                                              | 4                                                     |

\* Versión original

| <b>4. INSTRUMENTAL ACTIVITIES OF DAILY LIVING (iADL)</b><br>Explanation: assistance includes physical assistance, verbal instruction, or supervision by another person. It may be considered <i>essential</i> when there is a need for physical help (by another person) with an activity or for supervision, or the patient needs prompting or reminding to do a task. The need for supervision for safety reasons should be due to <i>objective danger</i> that is posed, rather than 'just in case'. | <b>Corresponding PCFS scale grade if the answer is 'YES'</b> |
|---------------------------------------------------------------------------------------------------------------------------------------------------------------------------------------------------------------------------------------------------------------------------------------------------------------------------------------------------------------------------------------------------------------------------------------------------------------------------------------------------------|--------------------------------------------------------------|
| 4.1 Is assistance essential for basic household chores which are important for daily life?<br>(E.g. preparing a simple meal, doing the dishes, take out the garbage; exclude chores that do not need to be done every day)                                                                                                                                                                                                                                                                              | <b>4</b>                                                     |
| 4.2 Is assistance essential for local travel?<br>(Local travel without assistance: the patient may drive or use public transport to get around. Ability to use a taxi is sufficient, provided the patient can manage to call and instruct the driver)                                                                                                                                                                                                                                                   | <b>4</b>                                                     |
| 4.3 Is assistance essential for local shopping?<br>(The patient is not able to buy groceries or necessities by him or herself)                                                                                                                                                                                                                                                                                                                                                                          | <b>3</b>                                                     |

| <b>5. PARTICIPATION IN USUAL SOCIAL ROLES</b><br>Explanation: this section concerns impairment in fulfilment of major social roles (not social or financial circumstances).                                                                                                                                                                                                                                                                                                                | <b>Corresponding PCFS scale grade if the answer is 'YES'</b> |
|--------------------------------------------------------------------------------------------------------------------------------------------------------------------------------------------------------------------------------------------------------------------------------------------------------------------------------------------------------------------------------------------------------------------------------------------------------------------------------------------|--------------------------------------------------------------|
| 5.1 Is adjustment essential for duties/activities at home or at work/study because you are unable to perform these yourself<br>(e.g. resulting in a change in the level of responsibility, a change from full-time to part-time work or a change in education)?<br>(Work refers to both paid employment and voluntary work. Special arrangements which allow someone to return to work, even though normally he/she wouldn't be able to work, should be considered as adjustment of work.) | <b>3</b>                                                     |
| 5.2 Do you occasionally need to avoid or reduce duties/activities at home or at work/study or do you need to spread these over time (while you are basically able to perform all those activities)?                                                                                                                                                                                                                                                                                        | <b>2</b>                                                     |
| 5.3 Can you no longer take good care of loved ones as before?<br>(Taking good care includes babysitting, looking after your partner, parents, grandchildren or dependent others.)                                                                                                                                                                                                                                                                                                          | <b>3</b>                                                     |
| 5.4 Since the COVID-19 diagnosis, have there been problems with relationships or have you become isolated?<br>(These problems include communication problems, difficulties in relationships with people at home or at work/study, loss of friendships (increase in) isolation, etc.)                                                                                                                                                                                                       | <b>3</b>                                                     |
| 5.5 Are you restricted in participating in social and leisure activities?<br>(Comprising hobbies and interests, including going to a restaurant, bar, cinema, going for walks, playing games, reading books, etc.)                                                                                                                                                                                                                                                                         | <b>2</b>                                                     |

\* Versión original

| <b>6. SYMPTOM CHECKLIST</b><br>Explanation: these can be any symptoms or problems reported by the patients or found on physical examination.<br>Symptoms include but are not limited to: dyspnoea, pain, fatigue, muscle weakness, memory loss, depression and anxiety. | <b>Corresponding PCFS scale grade if the answer is 'YES'</b> |
|-------------------------------------------------------------------------------------------------------------------------------------------------------------------------------------------------------------------------------------------------------------------------|--------------------------------------------------------------|
| 6.1 Do you report symptoms through which usual duties/activities need to be avoided, reduced or spread over time?                                                                                                                                                       | <b>2</b>                                                     |
| 6.2 Do you report any symptoms, resulting from COVID-19, without experiencing functional limitations?                                                                                                                                                                   | <b>1</b>                                                     |
| 6.3 Do you have problems with relaxing or do you experience COVID-19 as a trauma?<br>('Trauma' is defined as: suffering from intrusive memories, flashbacks or avoidance responses, associated with having experienced COVID-19.)                                       | <b>1</b>                                                     |

**Assigning a grade on the post-COVID-19 functional status scale**

The overall rating is simply the poorest functional status indicated by the patient's answers (the highest grade corresponds with the most limitations). If a respondent has no limitations or symptoms, then the appropriate scale grade is 0.

**Final PCFS scale grade:** \_\_\_\_\_

What was your PCFS scale grade *before* COVID-19? \_\_\_\_\_

\* Versión original

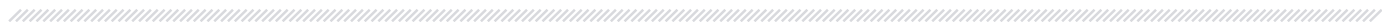

## ANEXO 4

**Table 3: Patient questionnaire for patient self-report of the Post-COVID-19 Functional Status Scale**

| <b>How much are you currently affected in your everyday life by COVID-19?</b><br><b>Please indicate which one of the following statements applies to you most. Please tick only one box at a time.</b>                                                                | <b>Corresponding PCFS scale grade</b><br><b>if the box is ticked</b> |
|-----------------------------------------------------------------------------------------------------------------------------------------------------------------------------------------------------------------------------------------------------------------------|----------------------------------------------------------------------|
| I have no limitations in my everyday life and no symptoms, pain, depression or anxiety.                                                                                                                                                                               | <input type="checkbox"/> 0                                           |
| I have negligible limitations in my everyday life as I can perform all usual duties/activities, although I still have persistent symptoms, pain, depression or anxiety.                                                                                               | <input type="checkbox"/> 1                                           |
| I suffer from limitations in my everyday life as I occasionally need to avoid or reduce usual duties/activities or need to spread these over time due to symptoms, pain, depression or anxiety. I am, however, able to perform all activities without any assistance. | <input type="checkbox"/> 2                                           |
| I suffer from limitations in my everyday life as I am not able to perform all usual duties/activities due to symptoms, pain, depression or anxiety. I am, however, able to take care of myself without any assistance.                                                | <input type="checkbox"/> 3                                           |
| I suffer from severe limitations in my everyday life: I am not able to take care of myself and therefore I am dependent on nursing care and/or assistance from another person due to symptoms, pain, depression or anxiety.                                           | <input type="checkbox"/> 4                                           |

\* Versión original

## ANEXO 5

Figure 1: Flowchart for patient self-report of the Post-COVID-19 Functional Status Scale

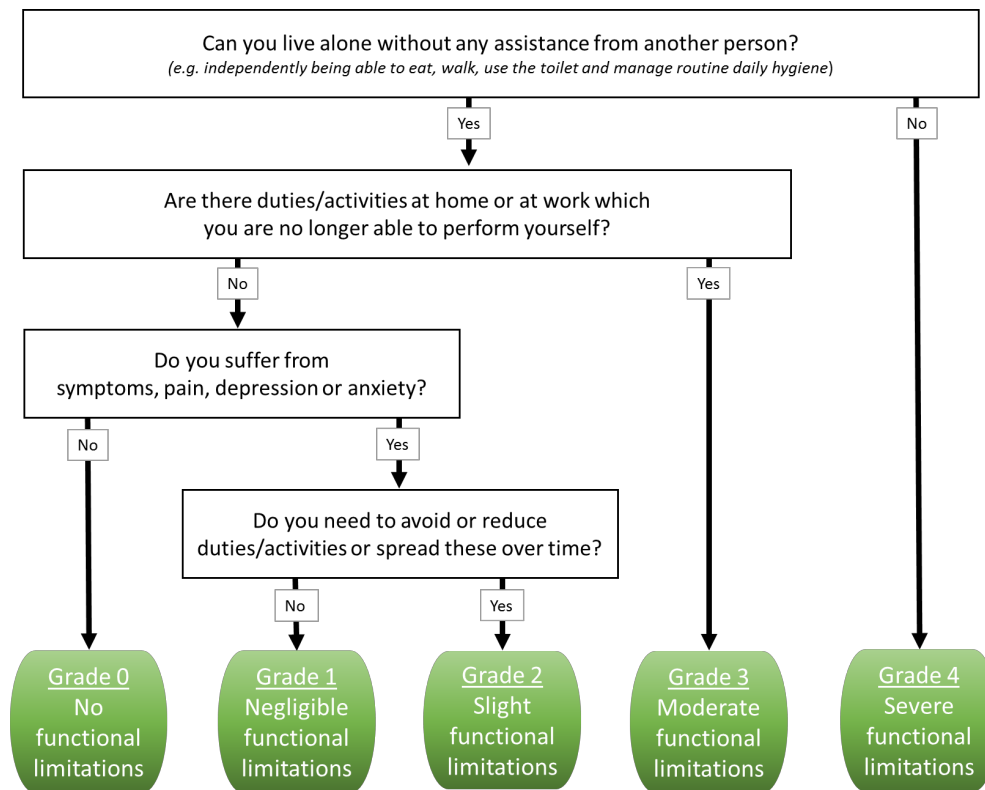

\* Versión original
